# Supplementary material for: Evaluation of Serum-Paired miRNA Ratios for Early Diagnosis of Non-Small Cell Lung Cancer Using Quantum Dot-Based Suspension Array
Source: Hindawi journal article supplement (doi:10.1155/2018/5456731), 2018-08-01
Supplement: f1 [file 5456731.f1.docx]

**Table S1 The chi-square test between the diagnostic miRNAs and golden standard**

|  | | Golden standard (biopsy) | | | total |
| --- | --- | --- | --- | --- | --- |
| Positive | | Negative |
| hsa-miR-20a-5p | Positive (%) | 111 (77.6%) | 9 (16.4%) | | 120 (60.6%) |
| Negative (%) | 32(22.4%) | 46(83.6%) | | 78(39.4%) |
| Total (n) | | 143 | 55 | | 198 |
| Total (%) | | 100% | 100% | | 100% |

Positive: lower than the best diagnostic cut-off value

Sensitivity = A/ (A+C)*100%=0.776

Specificity = D/ (B+D)*100%=0.836

Positive predictive value = A/ (A+B)*100%=0.925

Negative predictive value = D/ (C+D)*100%=0.590

Misdiagnosis rate = B/ (B+D)=0.164

Failure diagnosis rate = C/ (A+C)=0.224

Diagnostic accordance rate = (A+D)/ (A+B+C+D)=0.793

|  | | Golden standard (biopsy) | | total |
| --- | --- | --- | --- | --- |
| Positive | Negative |
| hsa-miR-15b-5p | Positive (%) | 88 (83.8%) | 25 (30.5%) | 113 (60.4%) |
| Negative (%) | 17 (16.2%) | 57 (69.5%) | 74 (39.6%) |
| Total (n) | | 105 | 82 | 187 |
| Total (%) | | 100% | 100% | 100% |

Positive: higher than the best diagnostic cut-off value

Sensitivity = A/(A+C)*100%=0.838

Specificity = D/(B+D)*100%=0.695

Positive predictive value = A/(A+B)*100%=0.779

Negative predictive value = D/(C+D)*100%=0.770

Misdiagnosis rate = B/(B+D)=0.305

Failure diagnosis rate = C/(A+C)=0.162

Diagnostic accordance rate = (A+D)/(A+B+C+D)=0.775

|  | | Golden standard (biopsy) | | total |
| --- | --- | --- | --- | --- |
| Positive | Negative |
| hsa-miR-17-5p | Positive (%) | 66 (75.9%) | 29 (34.1%) | 95 (55.2%) |
| Negative (%) | 21(24.1%) | 56 (65.9%) | 77 (44.8%) |
| Total (n) | | 87 | 85 | 172 |
| Total (%) | | 100% | 100% | 100% |

Positive: higher than the best diagnostic cut-off value

Sensitivity = A/(A+C)*100%=0.759

Specificity = D/(B+D)*100%=0.659

Positive predictive value = A/(A+B)*100%=0.695

Negative predictive value = D/(C+D)*100%=0.727

Misdiagnosis rate = B/(B+D)=0.341

Failure diagnosis rate = C/(A+C)=0.241

Diagnostic accordance rate = (A+D)/(A+B+C+D)=0.709

|  | | Golden standard (biopsy) | | total |
| --- | --- | --- | --- | --- |
| Positive | Negative |
| hsa-miR-16-5p | Positive (%) | 114 (79.7%) | 5 (9.1%) | 119 (60.7%) |
| Negative (%) | 29(20.3%) | 48 (90.6%) | 77(39.3%) |
| Total (n) | | 143 | 53 | 196 |
| Total (%) | | 100% | 100% | 100% |

Positive: lower than the best diagnostic cut-off value

Sensitivity = A/(A+C)*100%=0.797

Specificity = D/(B+D)*100%=0.906

Positive predictive value = A/(A+B)*100%=0.958

Negative predictive value = D/(C+D)*100%=0.623

Misdiagnosis rate = B/(B+D)=0.094

Failure diagnosis rate = C/(A+C)=0.203

Diagnostic accordance rate = (A+D)/(A+B+C+D)=0.827

|  | | Golden standard (biopsy) | | total |
| --- | --- | --- | --- | --- |
| Positive | Negative |
| hsa-miR-19a-3p | Positive (%) | 102 (72.3%) | 18 (32.1%) | 120 (60.9%) |
| Negative (%) | 39 (27.7%) | 38 (67.9%) | 77(39.1%) |
| Total (n) | | 141 | 56 | 197 |
| Total (%) | | 100% | 100% | 100% |

Positive: lower than the best diagnostic cut-off value

Sensitivity = A/(A+C)*100%=0.723

Specificity = D/(B+D)*100%=0.679

Positive predictive value = A/(A+B)*100%=0.850

Negative predictive value = D/(C+D)*100%=0.494

Misdiagnosis rate = B/(B+D)=0.321

Failure diagnosis rate = C/(A+C)=0.277

Diagnostic accordance rate = (A+D)/(A+B+C+D)=0.711

**Table S2 The chi-square test between the paired miRNAs and golden standard**

|  | | Golden standard（biopsy） | | total |
| --- | --- | --- | --- | --- |
| positive | negative |
| hsa-miR-15b-5p/hsa-miR-20a-5p | Positive% | 89(83.2%) | 19(25.7%) | 108(59.7%) |
| negative % | 18(16.8%) | 55(74.3%) | 73(40.0%) |
| Total(n) | | 107 | 74 | 181 |
| Total (%) | | 100% | 100% | 100% |

Positive: higher than the best diagnostic cut-off value

Sensitivity = A/(A+C)*100%=0.832

Specificity = D/(B+D)*100%=0.743

Positive predictive value = A/(A+B)*100%=0.832

Negative predictive value = D/(C+D)*100%=0.753

Misdiagnosis rate = B/(B+D)=0.257

Failure diagnosis rate = C/(A+C)=0.168

Diagnostic accordance rate = (A+D)/(A+B+C+D)=0.796

|  | | Golden standard（biopsy） | | total |
| --- | --- | --- | --- | --- |
| positive | negative |
| hsa-miR-15b-5p/hsa-miR-16-5p | Positive% | 103(79.2%) | 7(13.2%) | 110(60.1%) |
| negative % | 27 (20.8%) | 46(86.8%) | 73(39.9%) |
| Total(n) | | 107 | 130 | 53 |
| Total (%) | | 100% | 100% | 100% |

Positive: higher than the best diagnostic cut-off value

Sensitivity = A/(A+C)*100%=0.792

Specificity = D/(B+D)*100%=0.868

Positive predictive value = A/(A+B)*100%=0.936

Negative predictive value = D/(C+D)*100%=0.630

Misdiagnosis rate = B/(B+D)=0.132

Failure diagnosis rate = C/(A+C)=0.208

Diagnostic accordance rate = (A+D)/(A+B+C+D)=0.814
